# Supplementary material
Source: Springer Nature journal article supplement (https://www.springermedizin.de/resource/supplementary/12884_2007_2_MOESM3_ESM.pdf/9459754)
Supplement: MOESM3 [file 9459754]

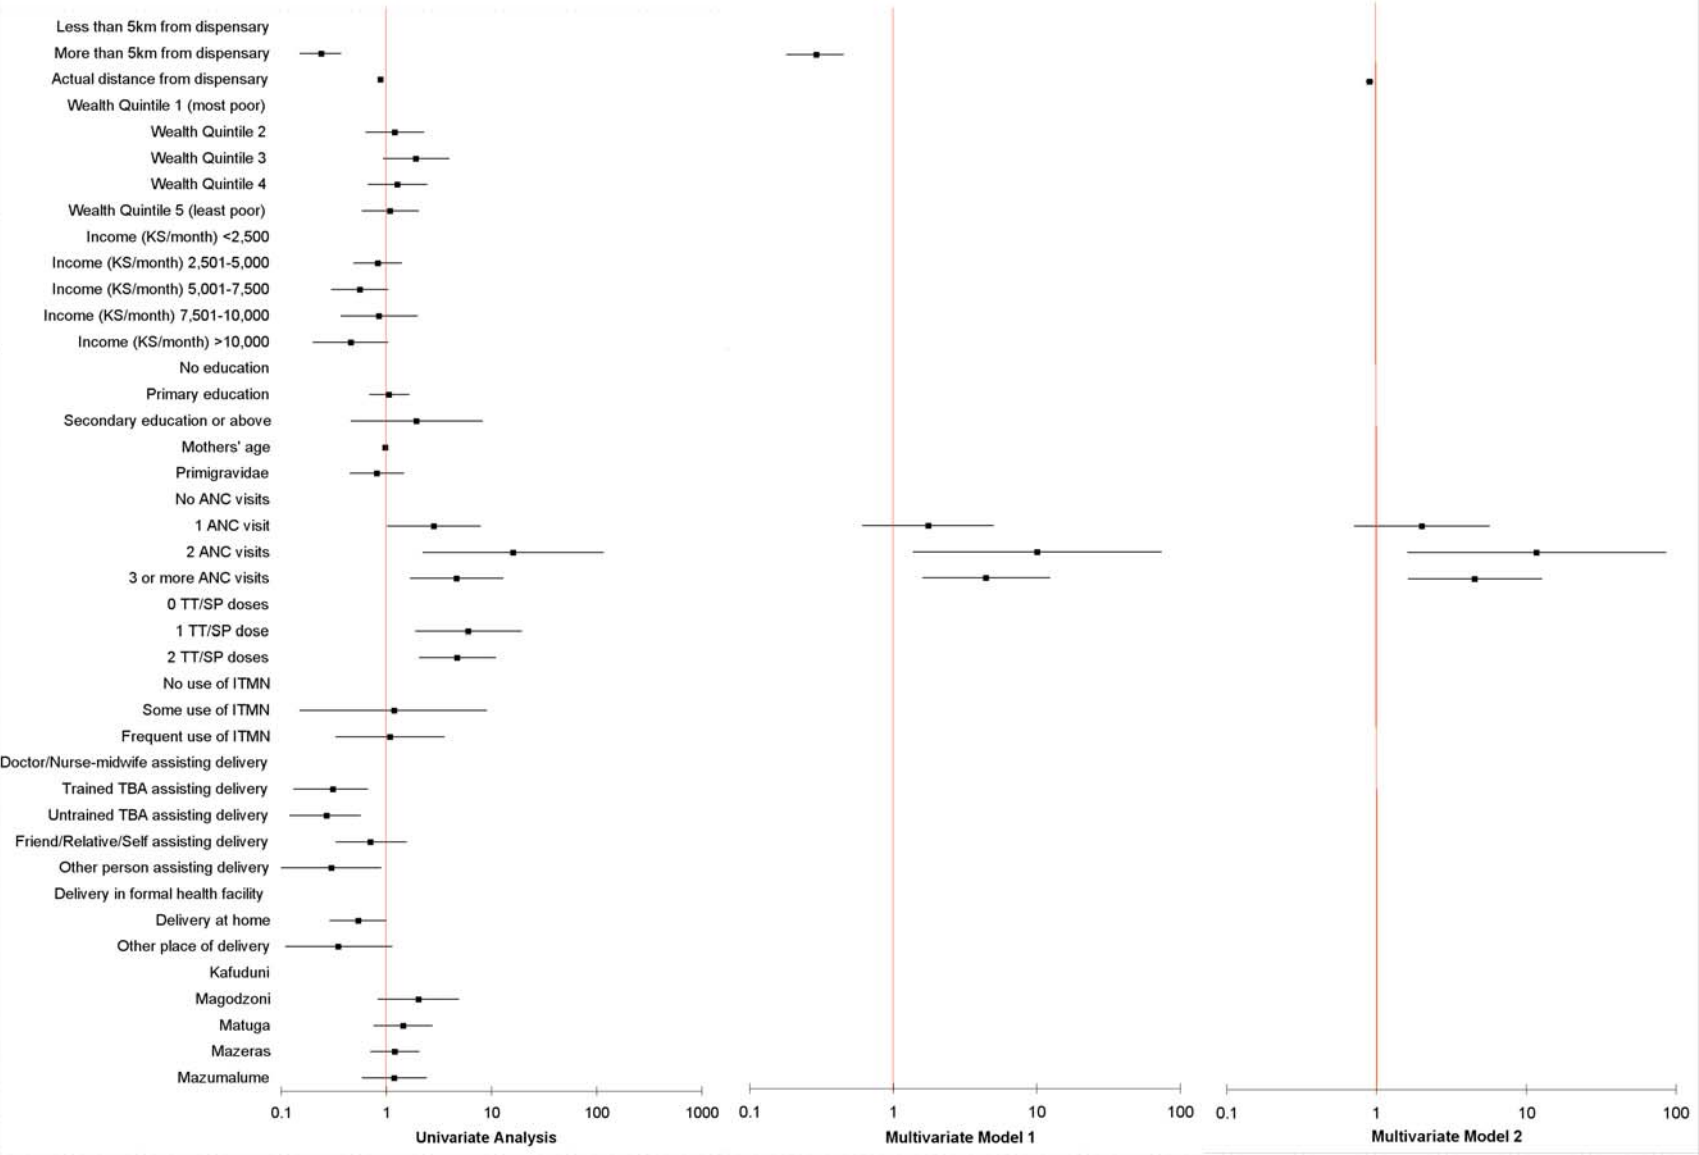

Odds Ratio (95% CI) - Logarithmic Scale

Multivariate model 1 uses distance from dispensary as a dichotomous variable, Multivariate model 2 uses distance as a continuous variable
